# Supplementary material for: Determination of propellant products by time resolved and spatial distribution LIPS combined with high-speed schlieren imaging
Source: Royal Society of Chemistry journal article supplement (doi:10.1039/d3ja00283g), 2024-01-01
Supplement: d3ja00283g1.pdf [file d3ja00283g1.pdf]

## Supplementary Information

### Determination of Propellant Products by Time Resolved and Spatial Distributed LIPS Combined with High-Speed Schlieren Image

Xinyu Zhang,<sup>ab</sup> An Li,<sup>ab</sup> Ying Zhang,<sup>ab</sup> Yunsong Yin,<sup>ab</sup> Xianshuang Wang,<sup>ab</sup> Yage He,<sup>ab</sup> Jing Lyv,<sup>ab</sup> Yuheng Shan,<sup>ab</sup> Xiaodong Liu,<sup>ab</sup> Wen Yi,<sup>ab</sup> Lin Zhong,<sup>ab</sup> Yeping Ren,<sup>ab</sup> Min Xia<sup>\*bc</sup> and Ruibin Liu<sup>\*ab</sup>

<sup>a</sup>Key Lab of Precision Spectroscopy and Optoelectronic Technology, School of Physics, Beijing Institute of Technology, Beijing 100081, China.

<sup>b</sup>Frontiers Science center for High Energy Material (MOE), Beijing Institute of Technology, Beijing 100081, China.

<sup>c</sup>School of Materials Science and Engineering, Beijing Institute of Technology, Beijing, 100081, China.

\*Corresponding author email: xminbit@bit.edu.cn; liusir@bit.edu.cn

#### Table of contents

Figure S1. The comparison diagram of the background spectrum of argon atmosphere and the spectrum of products at the delay time of 200  $\mu$ s as the distance is 5 mm.

Figure S2. The comparison diagram of the background spectrum of air atmosphere and (a) CN bands and (b) AlO bands in spectra of products in air with the delay time at 3  $\mu$ s, 5  $\mu$ s, 15  $\mu$ s, 60  $\mu$ s, 100  $\mu$ s, 200  $\mu$ s and 350  $\mu$ s as the distance is 5 mm.

Figure S3. The comparison diagram of the background spectrum of air atmosphere and (a) C I 247.67 nm, (b) Al I 396.04 nm and (c) N I 746.74 nm, O I 777.07 nm in spectra of products in air with the delay time at 3  $\mu$ s, 5  $\mu$ s, 15  $\mu$ s, 60  $\mu$ s, 100  $\mu$ s, 200  $\mu$ s and 350  $\mu$ s as the distance is 5 mm.

Figure S4. The comparison diagram of the background spectrum of air atmosphere and (a) CN bands and (b) AlO bands in spectra of products in air with the delay time at 3  $\mu$ s, 5  $\mu$ s, 15  $\mu$ s, 60  $\mu$ s, 100  $\mu$ s, 200  $\mu$ s and 350  $\mu$ s as the distance is 7 mm.

Figure S5. The comparison diagram of the background spectrum of air atmosphere and (a) C I 247.67 nm, (b) Al I 396.04 nm and (c) N I 746.74 nm, O I 777.07 nm in spectra of products in air with the delay time at 3  $\mu$ s, 5  $\mu$ s, 15  $\mu$ s, 60  $\mu$ s, 100  $\mu$ s, 200  $\mu$ s and 350  $\mu$ s as the distance is 7 mm.

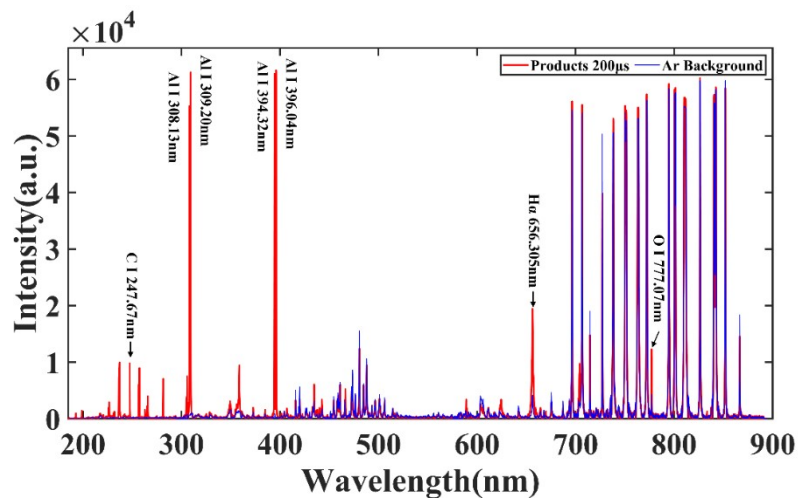

Figure S1. The comparison diagram of the background spectrum of argon atmosphere and the spectrum of products at the delay time of 200  $\mu\text{s}$  as the distance is 5 mm.

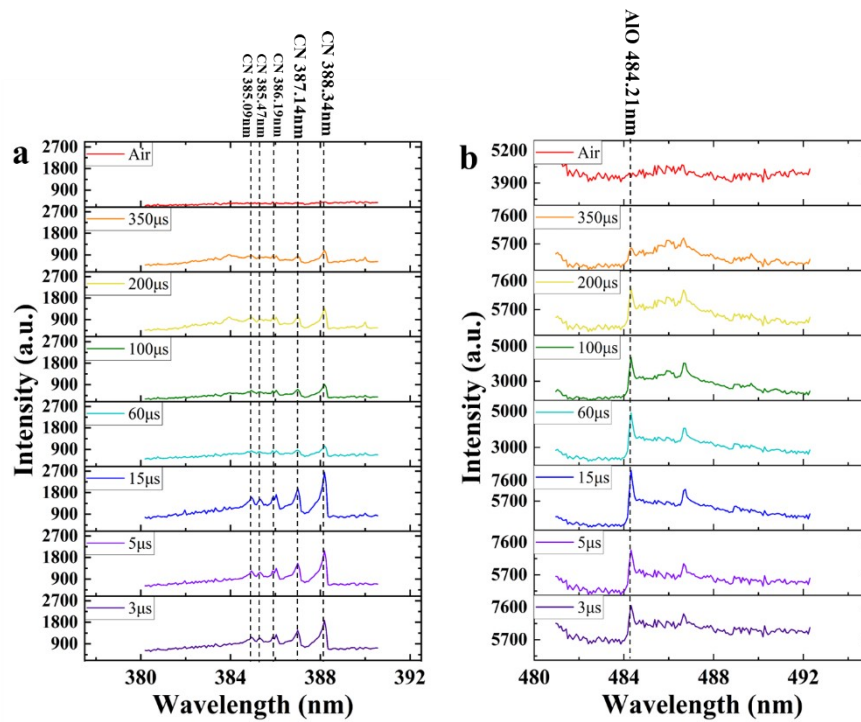

Figure S2. The comparison diagram of the background spectrum of air atmosphere and (a) CN bands and (b) AlO bands in spectra of products in air with the delay time at 3  $\mu\text{s}$ , 5  $\mu\text{s}$ , 15  $\mu\text{s}$ , 60  $\mu\text{s}$ , 100  $\mu\text{s}$ , 200  $\mu\text{s}$  and 350  $\mu\text{s}$  as the distance is 5 mm.

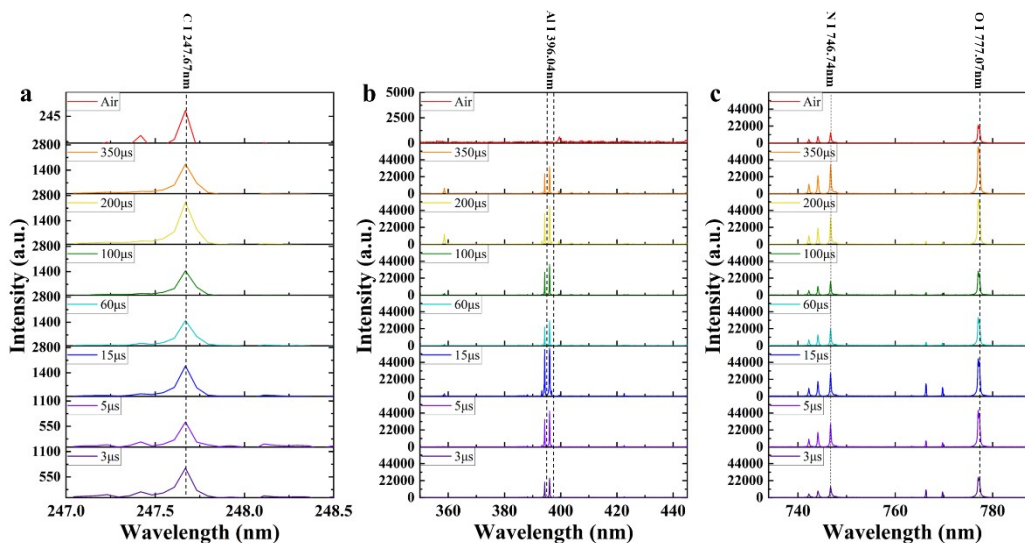

Figure S3. The comparison diagram of the background spectrum of air atmosphere and (a) C I 247.67 nm, (b) Al I 396.04 nm and (c) N I 746.74 nm, O I 777.07 nm in spectra of products in air with the delay time at 3  $\mu$ s, 5  $\mu$ s, 15  $\mu$ s, 60  $\mu$ s, 100  $\mu$ s, 200  $\mu$ s and 350  $\mu$ s as the distance is 5 mm.

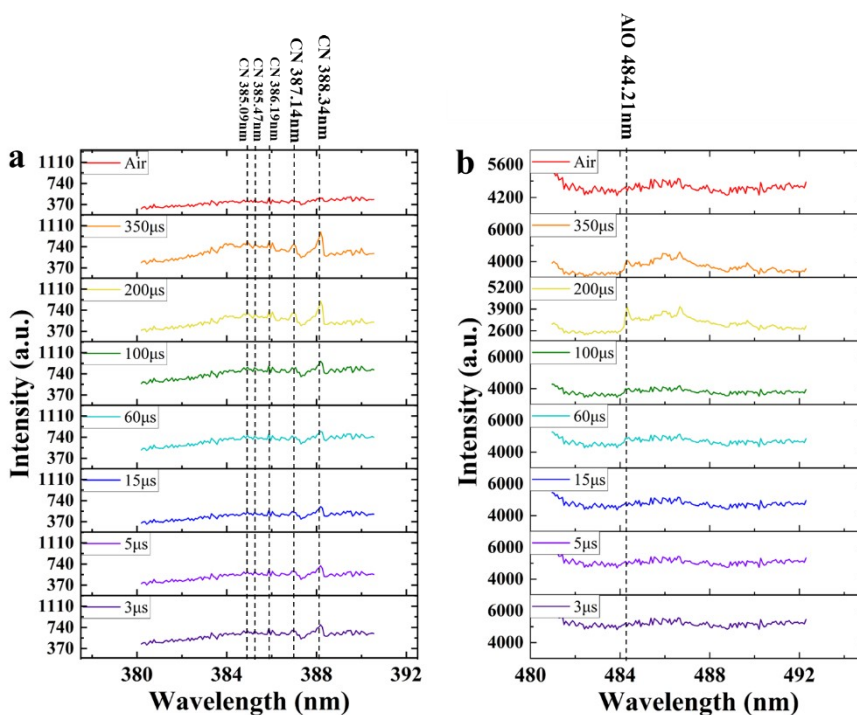

Figure S4. The comparison diagram of the background spectrum of air atmosphere and (a) CN bands and (b) AlO bands in spectra of products in air with the delay time at 3  $\mu$ s, 5  $\mu$ s, 15  $\mu$ s, 60  $\mu$ s, 100  $\mu$ s, 200  $\mu$ s and 350  $\mu$ s as the distance is 7 mm.

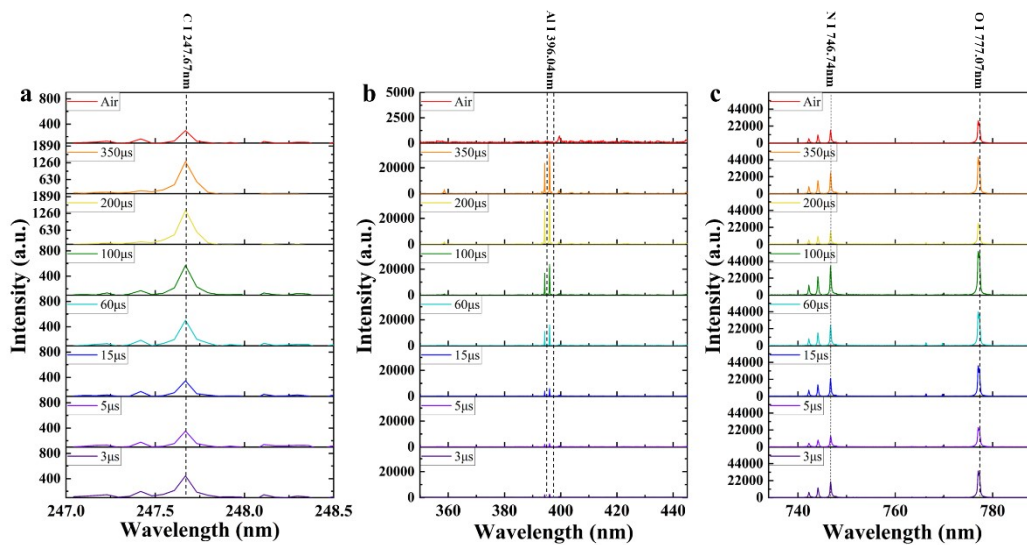

Figure S5. The comparison diagram of the background spectrum of air atmosphere and (a) C I 247.67 nm, (b) Al I 396.04 nm and (c) N I 746.74 nm, O I 777.07 nm in spectra of products in air with the delay time at 3  $\mu$ s, 5  $\mu$ s, 15  $\mu$ s, 60  $\mu$ s, 100  $\mu$ s, 200  $\mu$ s and 350  $\mu$ s as the distance is 7 mm.
